# Supplementary material for: Differential timing of neurogenesis underlies dorsal-ventral topographic projection of olfactory sensory neurons
Source: PubMed Central journal article supplement (PMC5307877; doi:10.1186/s13064-017-0079-0), 2017-02-13

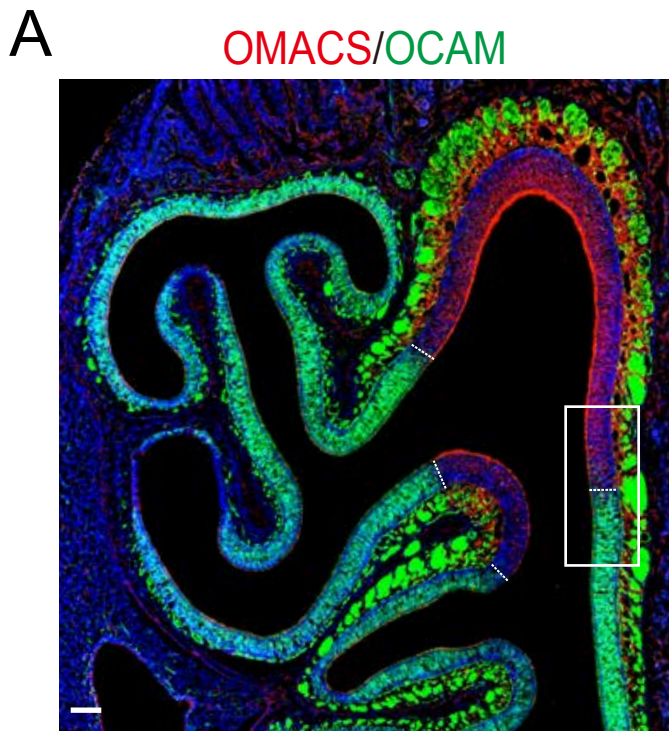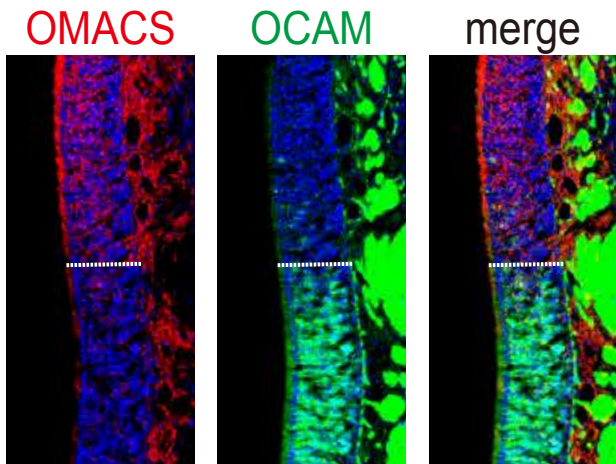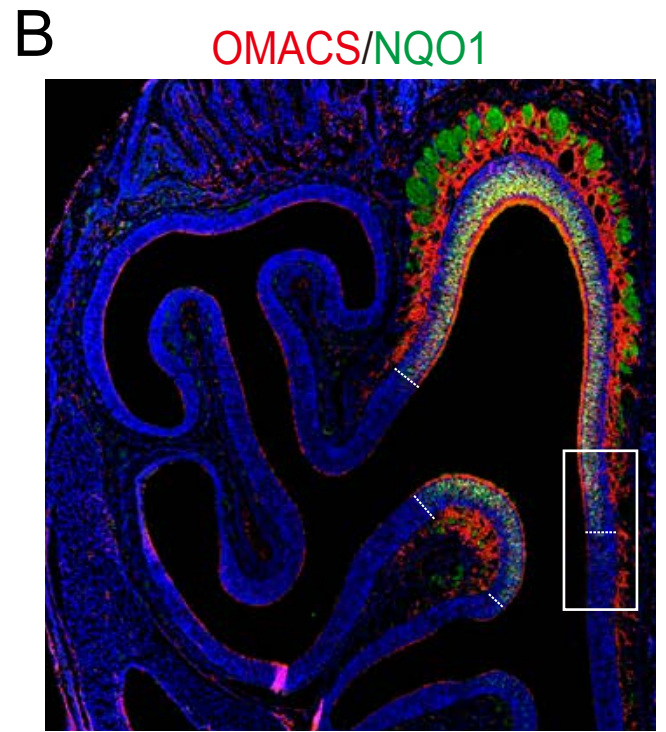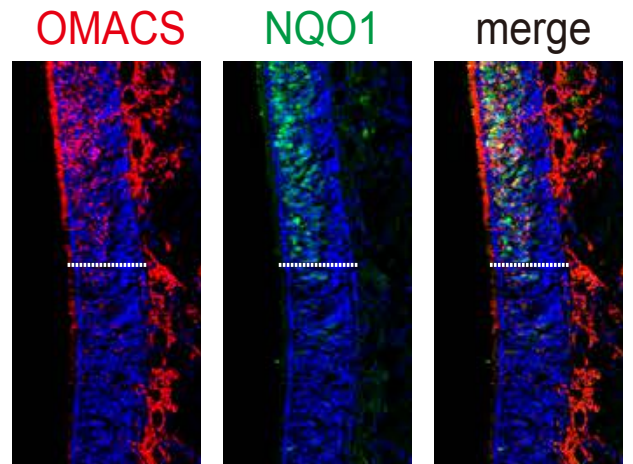

Supplement: 13064_2017_79_MOESM2_ESM.pdf [file 13064_2017_79_MOESM2_ESM.pdf]
